RESEARCH ARTICLE

# The Relationship between Health Literacy and Health Disparities: A Systematic Review

Sarah Mantwill\*, Silvia Monestel-Umaña, Peter J. Schulz

Institute of Communication & Health, University of Lugano, Lugano, Switzerland

\* [Sarah.Mantwill@usi.ch](mailto:Sarah.Mantwill@usi.ch)

## Abstract

### Objectives

Health literacy is commonly associated with many of the antecedents of health disparities. Yet the precise nature of the relationship between health literacy and disparities remains unclear. A systematic review was conducted to better understand in how far the relationship between health literacy and health disparities has been systematically studied and which potential relationships and pathways have been identified.

### Methods

Five databases, including PubMed/MEDLINE and CINAHL, were searched for peer-reviewed studies. Publications were included in the review when they (1) included a valid measure of health literacy, (2) explicitly conceived a health disparity as related to a social disparity, such as race/ethnicity or education and (3) when results were presented by comparing two or more groups afflicted by a social disparity investigating the effect of health literacy on health outcomes. Two reviewers evaluated each study for inclusion and abstracted relevant information. Findings were ordered according to the disparities identified and the role of health literacy in explaining them.

### Results

36 studies were included in the final synthesis. Most of the studies investigated racial/ethnic disparities, followed by some few studies that systematically investigated educational disparities. Some evidence was found on the mediating function of health literacy on self-rated health status across racial/ethnic and educational disparities, as well as on the potential effect of health literacy and numeracy on reducing racial/ethnic disparities in medication adherence and understanding of medication intake.

### Conclusion

Overall the evidence on the relationship between health literacy and disparities is still mixed and fairly limited. Studies largely varied with regard to health(-related) outcomes under investigation and the health literacy assessments used. Further, many studies lacked a

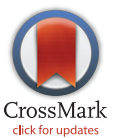

## OPEN ACCESS

**Citation:** Mantwill S, Monestel-Umaña S, Schulz PJ (2015) The Relationship between Health Literacy and Health Disparities: A Systematic Review. PLoS ONE 10(12): e0145455. doi:10.1371/journal.pone.0145455

**Editor:** Alessandro Antonietti, Catholic University of Sacro Cuore, ITALY

**Received:** September 11, 2015

**Accepted:** December 3, 2015

**Published:** December 23, 2015

**Copyright:** © 2015 Mantwill et al. This is an open access article distributed under the terms of the [Creative Commons Attribution License](https://creativecommons.org/licenses/by/4.0/), which permits unrestricted use, distribution, and reproduction in any medium, provided the original author and source are credited.

**Data Availability Statement:** All relevant data are within the paper and its Supporting Information files.

**Funding:** The authors have no support or funding to report.

**Competing Interests:** The authors have declared that no competing interests exist.

specific description of the nature of the disparity that was explored and a clear account of possible pathways tested.

## Introduction

Health disparities are differences in health that occur due to social, economic or environmental disadvantages. In particular groups that are more likely to fall victim of discrimination or segregation often face increased difficulties in preserving their health [1]. Disparities in health are mostly measured by comparing two or more groups to each other or to a reference group in general. Likely a disadvantaged group is compared to a more advantaged group, using an indicator of health or health-related outcome [2, 3]. In the United States (US) for example, studies have shown that those with lower education, less income and individuals from ethnic/racial minorities are more often afflicted by worse health compared to more socially advantaged groups [4, 5].

In the field of health literacy, often defined as the “degree to which individuals have the capacity to obtain, process and understand basic health information and services needed to make appropriate health decisions” [6], one does frequently find the underlying assumption that health literacy might explain some of the variation in health disparities that would be otherwise linked to other socioeconomic factors, such as education or income for example [7, 8]. Indeed health literacy has been found to be associated with many of the drivers of health disparities. Studies in the US have shown that non-Whites have more often limited health literacy than Whites [9–11]. Also factors such as lower income or education have been found to be associated with lower levels of health literacy [12, 13]. Thus suggesting that individuals likely to fall victim to social disparities, which in turn lead to worse health outcomes, are also more likely to have lower levels of health literacy.

Healthcare practitioners and researchers, as well as policy makers, have recognized the need to focus on health literacy as a potential intervenable factor by which health disparities can potentially be reduced [14, 15]. However, the precise nature of the relationship between health literacy and health disparities remains unclear. Consequently, also potential explanatory pathways and conceptualizations on how health literacy contributes to disparities remain rather vague.

Adding to Berkman and colleagues’ work [9] the aim of this systematic review was to evaluate to which extent research so far has systematically investigated the relationship between health literacy and health disparities, and whether potential relationships and pathways have been identified. In doing so, the review not only sought to contribute to a better theoretical understanding on how health literacy contributes to disparities, but also to identify gaps and missing links that might warrant further investigation, and to better understand potential leverage points for research, as well as for interventions that aim at reducing disparities.

## Methods

### Search strategy and inclusion criteria

A review protocol was developed and reviewed by two experts in the field of health literacy and health disparities. This review followed the Preferred Reporting Items for Systematic Reviews and Meta-Analyses (PRISMA) [16] (S1 Appendix). To identify relevant published articles the following databases were systematically searched: Cochrane Library, Cumulative Index to Nursing and Allied Health Literature (CINAHL), Educational Resources Information Center

(ERIC), PsycInfo and PubMed/Medline. Searches were not limited to any specific time frame or specific language.

The search terms for “health disparities” included related concepts such as “inequality”, “race”, “minority” or “gender”, which had been identified previously using a scoping search. For “health literacy” also the term literacy in combination with “health” was separately included. In addition, the search term “numeracy” was included. When navigating the health-care system people do not only need to have the ability to read and understand written medical information but also often have to interpret information that is presented in numerical form, such as information in a table or dosage instructions [17].

Truncations (wildcard searches) (\*), hyphens and other relevant Boolean operators were used to make the search as sensitive as possible (Fig 1). Appropriate MeSH terms were used for searches in PubMed (S2 Appendix). Electronic searches were supplemented by hand searches, and search alerts were set until February 2015. Reference lists of the included articles were further reviewed to identify remaining studies.

Articles were included when they (1) were peer-reviewed (dissertations excluded), (2) included a valid measure of health literacy (direct or indirect), (3) explicitly conceived a health disparity as related to a social disparity/disadvantage, such as race, ethnicity, education or

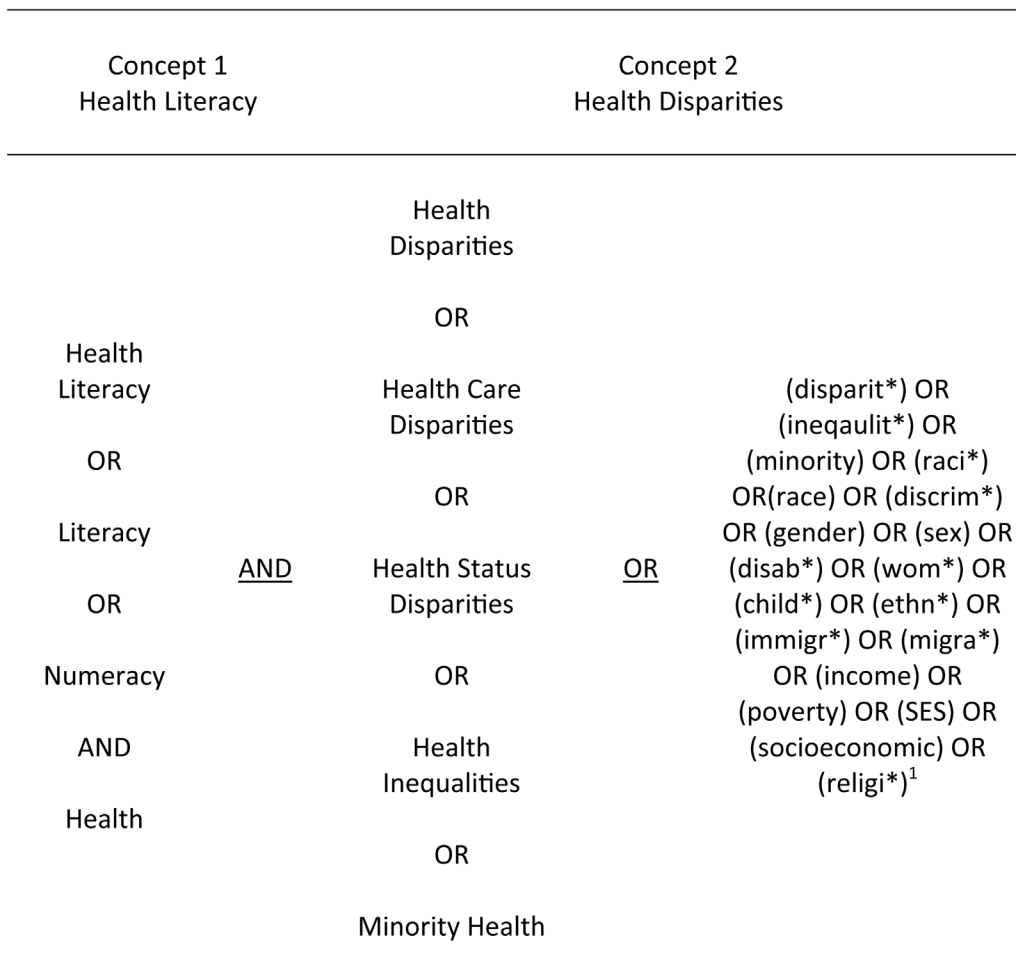

**Fig 1. Overview of search strategy.** <sup>1</sup>For demonstration purposes only the last search terms include Boolean operators.

doi:10.1371/journal.pone.0145455.g001

gender and (4) when results were presented by comparing two or more groups afflicted by a social disparity investigating the effect of health literacy on health outcomes.

Measures of health literacy were considered valid if they had been previously tested and had shown construct and/or criterion validity. In addition, measures that showed to have sufficient face validity and were validated in the study under investigation were also considered. It was *not* sufficient if, for instance, a difference in health literacy levels between two racial groups was reported as a secondary outcome. Furthermore, age was not considered to be a predictor of health disparities because certain differences are natural and are likely to occur for other reasons than being socially, economically, or environmentally disadvantaged [2, 18]. Examples are differences between different work positions of which one is more prone to accidents than the other or, in this case, differences between younger and older populations [18].

Any observational study, including cross-sectional, cohort and case-control, examining the relationship between health literacy and health disparities was considered, as well as any experimental study testing for disparities with regard to health literacy. Studies had to report on the association between the disparity under investigation and health literacy. Studies that measured solely disease knowledge were excluded.

## Screening process

After having extracted relevant abstracts from the databases, one reviewer screened all abstracts and titles for duplicates. In a second step two reviewers screened the abstracts for relevance to be included in the review. Discrepant assessments were resolved by discussion. Full manuscripts were retrieved for those abstracts that were identified to be relevant. Two reviewers independently extracted data from the selected studies, using a pre-designed data extraction form, which had been piloted before. Data were synthesized for final analysis and systematically screened by the two reviewers to ensure the correctness of the information. Based on criteria defined by Berkman and colleagues [9], the same reviewers independently rated the quality of articles. Studies were evaluated either as good, fair or poor. The quality assessment tool took such things as selection bias, measurement bias and confounding variables into consideration. Also here disagreement was resolved by consensus finding.

Given that study characteristics varied with regard to health literacy measures, health outcomes, sample sizes and characteristics, it was not deemed feasible to carry out a meta-analysis. Therefore a narrative synthesis was undertaken.

As initially described, disparities in health are mostly measured by comparing two or more groups to each other using an indicator of health(-related) outcome. Therefore findings were ordered according to the health(-related) outcomes that were under investigation in the different included studies. This includes, for instance, self-reported health, cancer-related outcomes or outcomes related to disease control. The social disparity, such as race/ethnicity or gender, as related to the potential health disparity was further reported and the role of health literacy in explaining the disparity under investigation described. Only the association between health literacy and the relevant outcome variables was extracted, even though some of the studies might have reported on additional relationships.

## Results

After the removal of duplicates, 5766 abstracts were reviewed and 92 articles were included for full revision. 36 articles were included in the final synthesis (Fig 2). The authors are aware that other studies [19–24] have looked at similar relationships. However, it was decided to exclude

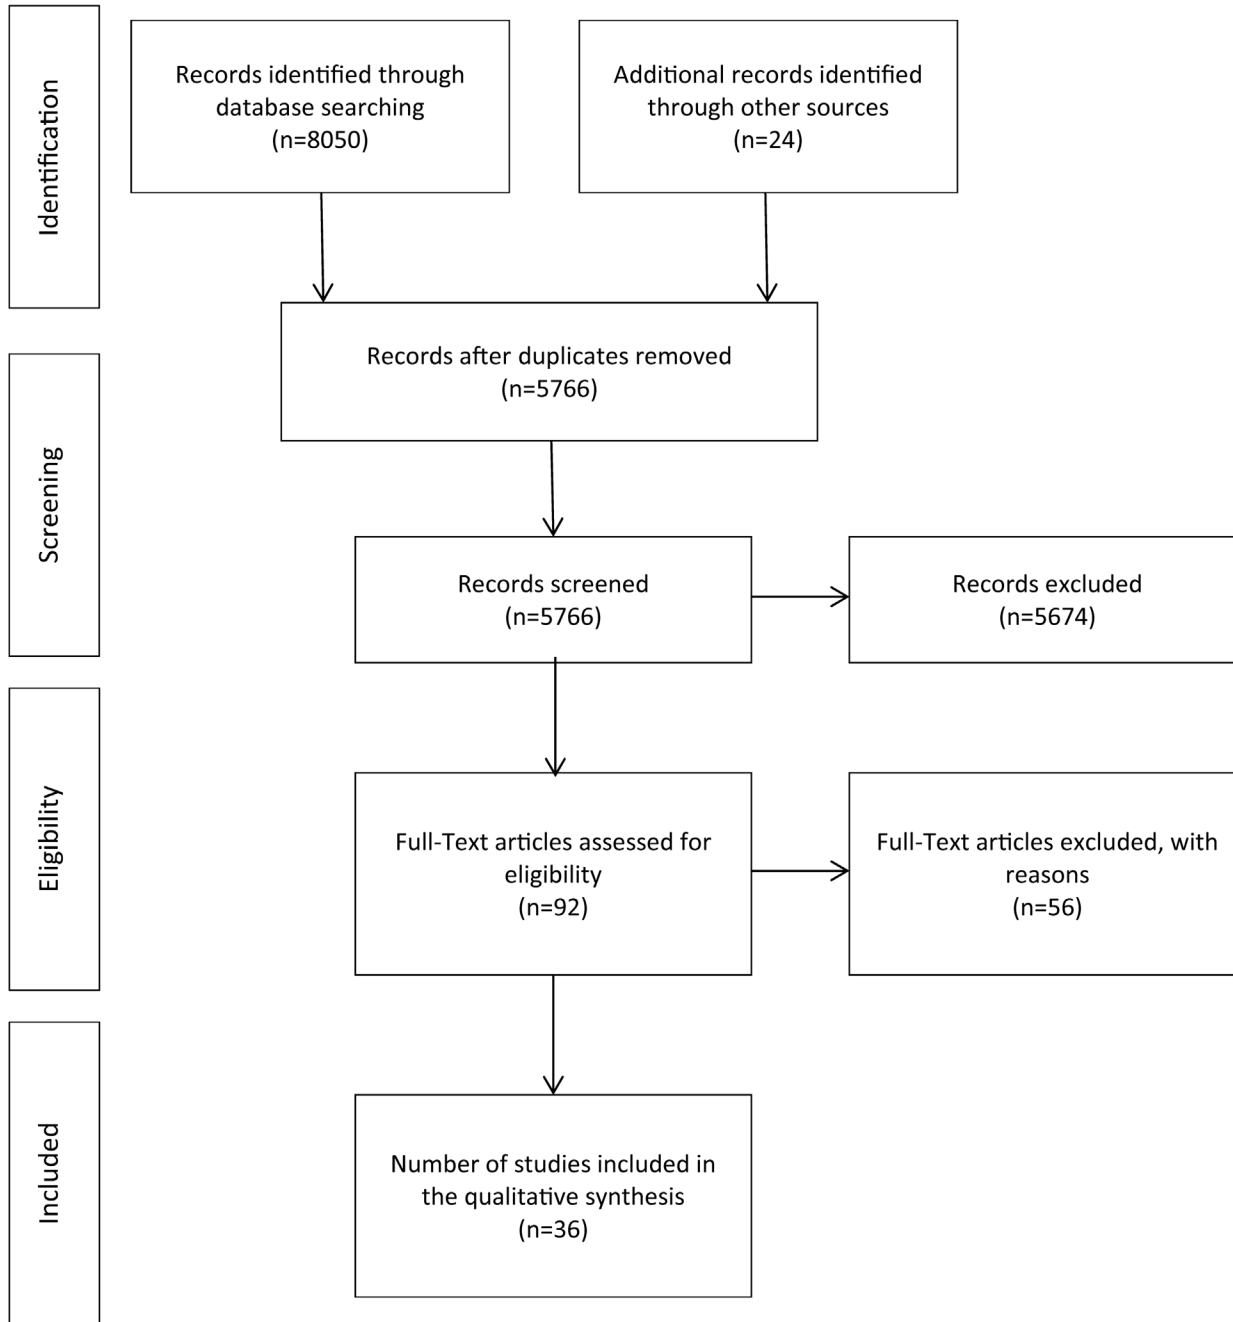

**Fig 2. Flowchart of screening process (adapted from: Moher, D., Liberati, A., Tetzlaff, J., & Altman, 2009).**

doi:10.1371/journal.pone.0145455.g002

them, as they did not sufficiently elaborate or did not explicitly acknowledge the relationship under investigation.

Most studies had been conducted in the US, except for five studies that had been conducted in Canada, China, the Netherlands and respectively the UK.

The following health(-related) outcomes were identified: (1.) self-reported health status, (2.) cancer-related outcomes, (3.) medication adherence/management, (4.) disease control, (5.)

preventive care, and (6.) end-of-life decisions. Other individual outcomes, such as usage of complementary and alternative medicine or BMI, were also identified and were grouped into (7.) “other health outcomes”.

Most of the studies focused on race/ethnicity as a social disparity leading to disparities in health(-related) outcomes. For example, eight out of the 36 studies focused on racial/ethnic and educational differences and investigated the influence of health literacy on disparities in self-reported health. Six studies looked into how health literacy might explain cancer-related outcomes that are potentially related to racial/ethnic disparities and another six studies investigated the impact of health literacy and numeracy on medication adherence and management with regard to race/ethnicity.

Some of the studies that were included in this review used multiple health literacy measures. However, the most commonly used measure was the Rapid Estimate of Adult Literacy (-Revised) (REALM-R) [25], which was applied in 15 studies. This was followed by the (Short)-Test of Functional Health Literacy (S-TOFHLA) [26], which had been used in 10 studies. Other measures included the Health Activities and Literacy Scale (HALS) [27] and the health literacy items in the National Assessment of Adult Literacy (NAAL) [10]. Only two studies used the screeners for limited health literacy developed by Chew and colleagues [28], as well as the Newest Vitale Sign (NVS) [29]. Only five studies were identified that tested numeracy skills.

Overall the quality was rated for 16 studies as “good”, 19 were rated as “fair” and only one study was considered to be of “poor” quality (Table 1).

## Self-reported health status

Eight studies investigated in how far health literacy might explain racial disparities in self-reported health status, including mental health.

Two studies found that health literacy mediated or respectively reduced the effect of race/ethnicity (black vs. Hispanic vs. white) and education on self-reported general health [30], including physical and mental health [31]. Three studies explored the link by focusing on Asian American groups and found mixed evidence. In one study, health literacy was significantly associated with self-reported health status and depression symptoms in White and Asian immigrants in general. However, when disaggregated in separate groups, health literacy was only significantly associated with self-reported health status in Chinese and Korean participants [32]. Similarly another study found that low health literacy was significantly associated with poor health status in Japanese and Filipinos, as well as in White participants [33]. On the other hand, another study found that limited English proficiency (LEP) was a more important predictor than health literacy in explaining differences in self-reported health status in Hispanics, Vietnamese, Whites and “other races”. Low health literacy was only significantly related to health status in Whites and “other races” but not in any Asian group. Further, Chinese, Vietnamese, Hispanics and “other races” with low health literacy *and* LEP had the highest odds of poor health status [34]. Similar patterns were identified in Canada (immigrants vs. non-immigrants) [35]. Even though health literacy was significantly associated with good self-rated health, discordance between native language and language of data collection reduced the effect of health literacy to non-significance. Similarly, another study from Canada found that among different generations of immigrants, health literacy was significantly associated with reported disability but the effect was largely accounted for by differences in education, employment and income [36].

In one study from China, which compared two ethnic groups (Han vs. Hui), health literacy was significantly associated with prevalence of pain in a minority group. There was also a

Table 1. Overview of included studies.

| First Author  | Design          | Participants                                                                                                                                                                                                 | Country | Self-Reported Health Status                                                                                                                    |                                                                                             | Outcomes assessed                        | Associations                                                                                                                                                                                                                                                                                                                     | Quality |
|---------------|-----------------|--------------------------------------------------------------------------------------------------------------------------------------------------------------------------------------------------------------|---------|------------------------------------------------------------------------------------------------------------------------------------------------|---------------------------------------------------------------------------------------------|------------------------------------------|----------------------------------------------------------------------------------------------------------------------------------------------------------------------------------------------------------------------------------------------------------------------------------------------------------------------------------|---------|
|               |                 |                                                                                                                                                                                                              |         | Instrument; Cut-off points                                                                                                                     | Sample                                                                                      |                                          |                                                                                                                                                                                                                                                                                                                                  |         |
| Lee, 2015     | Cross-sectional | White: 91%, Asian American immigrants: 9% (Chinese (3%), Koreans (2%), Filipinos (2%), South Asians (1%), Vietnamese (1%)                                                                                    | USA     | English, Spanish, Chinese (Mandarin, Cantonese), Korean, and Vietnamese: <b>two subjective proxy measures of health literacy</b> : continuous. | 2007 California Health Interview Survey (CHIS) (N = 33,668)                                 | Health status: Symptoms of depression    | HL was associated with health status and depression symptoms among Whites and aggregated Asian immigrants (p < .01). In Chinese and Koreans HL was a predictor of self-rated health status (p < .05). In Koreans and South Asians HL was a sig. predictor of depression symptoms (p < .05).                                      | F       |
| Omariba, 2011 | Cross-sectional | Non-immigrants: 83% (second generation Canadians: 14.8%), Immigrants: 17% (established European or American: 33.1%, countries: 42.6%, recent European or American: 4.6%, recent from other countries: 19.7%) | Canada  | English & French Health Activities Literacy Scale (HALS) (191 items): low vs. high                                                             | Participants International Adult Literacy and Skills Survey (IALSS), ≥16 years (N = 22,818) | Health status                            | HL on good self-rated health was reduced to n.sig. by discordance between mother tongue and language of survey administration (OR 0.65; 95% CI, 0.45–0.95).                                                                                                                                                                      | F       |
| Omariba, 2014 | Cross-sectional | First: 17%, Second: 12%, Third-plus generation immigrants and non-immigrants: 71%                                                                                                                            | Canada  | English & French Health Activities Literacy Scale (HALS) (191 items): low vs. high                                                             | Participants International Adult Literacy and Skills Survey (IALSS), ≥16 years (N = 22,818) | Disability                               | HL was n.sig. associated with self-reported disability among different immigrant groups. Among different generations of immigrants a sig. association was found but education, income and employment reduced its effect to n.sig.                                                                                                | F       |
| Sentell, 2011 | Cross-sectional | White: 34%, Japanese: 24.5%, Filipino: 14.2%, Native Hawaiians: 15.7%, other AA/PI (Asian Americans/Pacific Islanders): 11.6%                                                                                | USA     | English & Spanish Single Health Literacy Screener: low vs. adequate                                                                            | 2008 Hawaii Health Survey (HHS) (N = 4,399)                                                 | Health status: Depression; Diabetes; BMI | Low HL was associated with poor health status in Japanese, Filipinos, other AA/PI and Whites; with diabetes in Hawaiians and Japanese; and with depression in Hawaiians (p < .05). No sig. relationship between HL and being overweight was found.                                                                               | F       |
| Sentell, 2012 | Cross-sectional | White: 49% (<1% LEP), Vietnamese: 1.5 (38.5% LEP), Korean: 1.2% (39.3% LEP), Chinese: 3.5% (27.4% LEP), Latino: 21.6% (37.3% LEP), Other ethnicity: 23.1% (15.2% LEP)                                        | USA     | English, Spanish, Chinese (Mandarin, Cantonese), Korean, and Vietnamese: <b>two subjective proxy measures of health literacy</b> : continuous  | 2007 California Health Interview Survey (CHIS) (N = 48,427)                                 | Health status                            | Low HL was only sig. associated with poor health status in White and "other" participants (p < .05). LEP was a more important predictor of poor health status in Latinos, Vietnamese, and Whites. Highest odds of poor health status when low HL and low English proficiency combined in Latino, Chinese, Vietnamese and Others. | F       |

(Continued)



Table 1. (Continued)

|                                |                 |                                                                                                                                                          |             |                                                                                                                              |                                                                                                                                                  |                                                                            |                                                                                                                                                                                                                                                                                                                                                                                                                                                                                                                                                           |         |
|--------------------------------|-----------------|----------------------------------------------------------------------------------------------------------------------------------------------------------|-------------|------------------------------------------------------------------------------------------------------------------------------|--------------------------------------------------------------------------------------------------------------------------------------------------|----------------------------------------------------------------------------|-----------------------------------------------------------------------------------------------------------------------------------------------------------------------------------------------------------------------------------------------------------------------------------------------------------------------------------------------------------------------------------------------------------------------------------------------------------------------------------------------------------------------------------------------------------|---------|
| Wang, 2013                     | Cross-sectional | Hui minority: 57.5%, Han majority: 42.5%                                                                                                                 | China       | Chinese HL instruments based on revisions of the Chinese Adult Health Literacy Questionnaire (CAHLQ); low vs. high           | Field survey in Northwestern China (N = 913)                                                                                                     | Health-related quality of life                                             | In the Hui group, low HL was a sig. predictor of prevalence pain/discomfort impairments (PR 1.8830, 95% CI 1.06–1.58) but not for the Han group. For anxiety/depression the interaction effect of HL and with ethnic was sig. ( $p < .05$ ).                                                                                                                                                                                                                                                                                                              | F       |
| <b>Education</b>               |                 |                                                                                                                                                          |             |                                                                                                                              |                                                                                                                                                  |                                                                            |                                                                                                                                                                                                                                                                                                                                                                                                                                                                                                                                                           |         |
| van der Heide, 2013            | Cross-sectional | preprimary or primary education: 5.5%, lower secondary education: 24.5%, upper secondary education: 30.2%, tertiary education: 39.5%                     | Netherlands | Dutch Health Activities Literacy Scale (HALS) (191 items): very poor skills (level 1) to very strong skills (level 4)        | Participants Adult Literacy and Life Skills Survey (ALL), $\geq 25$ years (N = 5,136)                                                            | Health status (general health, physical health, mental health)             | HL partially mediated the relationship between education and self-reported general health, physical health and mental health ( $p < .01$ ). HL more important among participants with lower education than among those with higher education.                                                                                                                                                                                                                                                                                                             | G       |
| <b>Mixed</b>                   |                 |                                                                                                                                                          |             |                                                                                                                              |                                                                                                                                                  |                                                                            |                                                                                                                                                                                                                                                                                                                                                                                                                                                                                                                                                           |         |
| Bennett, 2009                  | Cross-sectional | Race/Ethnicity: White: 85.3%, Black: 7.3%, Latino/Hispanic: 5.1%, Other: 2.3%; Education: <high school: 24.3%, = high school: 38.5%, >high school: 37.3% | USA         | English & Spanish NAAL health literacy scale: 28 health-related literacy tasks: below basic, basic, intermediate, proficient | US adults nationally representative sample, $\geq 65$ years (Racial: N = 2,668; Education: N = 2,663)                                            | Health status; Preventive health behaviors                                 | HL mediated relationship between racial/ethnic (black vs. white) and self-rated health status and influenza vaccination ( $p < .001$ ). HL mediates relationship between education and self-rated health status, influenza vaccination, receipt of mammography, dental care ( $p < .001$ ).                                                                                                                                                                                                                                                               | G       |
| Howard, 2006                   | Cross-sectional | Racial/Ethnic: White: 87%, Black: 13%; Education: high school deg.: 64%, no deg.: 36%                                                                    | USA         | English & Spanish S-TOFHLA: inadequate, marginal, adequate                                                                   | Elderly individuals enrolling in Medicare managed care plans in 4 different locations, $\geq 65$ years (Racial: N = 2,850; Education: N = 3,260) | Physical and mental health; General health status; Receipt of vaccinations | HL reduced educational disparities for physical health (decrease of adjusted difference 0.7; 95% CI 0.4 to 0.9), mental health (decrease of adjusted difference 0.3; 95% CI 0.1–0.5), to a lesser extent for health status and very small extent for vaccination receipt. HL reduced racial disparities for physical health (decrease of adjusted difference 0.6; 95% CI 0.3 to 0.9), mental health (decrease of adjusted difference 0.3; 95% CI 0.1–0.5), to a lesser extent for self-rated health status and very small extent for vaccination receipt. | F       |
| <b>Cancer-Related Outcomes</b> |                 |                                                                                                                                                          |             |                                                                                                                              |                                                                                                                                                  |                                                                            |                                                                                                                                                                                                                                                                                                                                                                                                                                                                                                                                                           |         |
| First Author                   | Design          | Participants                                                                                                                                             | Country     | Instrument; Cut-off points                                                                                                   | Sample                                                                                                                                           | Outcomes assessed                                                          | Associations                                                                                                                                                                                                                                                                                                                                                                                                                                                                                                                                              | Quality |
| Bennett, 1998                  | Cross-sectional | White: 49%, Black: 51%                                                                                                                                   | USA         | English REALM: 6th vs. 3rd grade                                                                                             | Men at prostate cancer clinics (1.) a university hospital and (2.) VA medical center (N = 212)                                                   | Stage of presentation with prostate cancer                                 | After adjustment for HL, and other covariates, race was not a sig. predictor anymore. However, also HL (OR 1.6; 95% CI 0.8–3.4) was also no longer sig. associated with stage of presentation with prostate cancer                                                                                                                                                                                                                                                                                                                                        | G       |

(Continued)



Table 1. (Continued)

|                 |                 |                                                                                                                                                  |     |                                                                             |                                                                                                                             |                                                                                                |                                                                                                                                                                                                                                                                                    |   |
|-----------------|-----------------|--------------------------------------------------------------------------------------------------------------------------------------------------|-----|-----------------------------------------------------------------------------|-----------------------------------------------------------------------------------------------------------------------------|------------------------------------------------------------------------------------------------|------------------------------------------------------------------------------------------------------------------------------------------------------------------------------------------------------------------------------------------------------------------------------------|---|
| Freedman, 2015  | Cross-sectional | White: 44.5%, AA: 28.5%, Hispanic: 27%                                                                                                           | USA | English & Spanish Three Health Literacy Screeners <sup>1</sup> : continuous | Female breast cancer patients: population-based cohort (N = 500)                                                            | Knowledge about one's breast tumor characteristics                                             | HL reduced differences in Hispanic women (vs. white women) for knowing and correctness about their breast cancer characteristics ( $p < .05$ ). HL did not reduce differences in black women (vs. white women). Overall HL did not eliminate most of the racial differences found. | F |
| Matsuyama, 2011 | Cross-sectional | Non-Hispanic White: 55.1%, AA: 44.9%                                                                                                             | USA | English REALM, S-TOFHLA: continuous                                         | Newly diagnosed adults with solid tumor cancers, stages II-IV who would be receiving treatment at a cancer center (N = 138) | Self-reported cancer information needs                                                         | AA race was associated with greater information need but HL was not sig. associated with information needs. Educational attainment reduced the effect of race for most variables, including HL, on information needs to n. sig..                                                   | F |
| Wolf, 2006      | Cross-sectional | White: 31.5%, AA: 68.5%                                                                                                                          | USA | English REALM: low marginal, functional                                     | Men with newly diagnosed prostate cancer in outpatient oncology or urology clinics in four clinics (N = 308)                | Prostate-specific antigen (PSA) levels: medical charts                                         | After adjustment for HL skills and age, being black was n.sig. associated anymore with PSA levels. The inclusion of HL contributed to a reduction of 35% in the association between race and PSA level (without HL, AOR 4.6, 95% CI 2.0–9.5 vs. with HL, AOR 3.0, 95% CI 0.8–9.1)  | G |
| Song, 2014      | Cross-sectional | Caucasian-American: 49.8%, AA: 50.2%                                                                                                             | USA | English REALM: <high school vs. ≥high school                                | Participants of a prostate-cancer population based cohort study, 1 to 27 months after diagnosis (N = 1854)                  | Patient-provider communication (content of dialogue, affective component, nonverbal behaviors) | N.sig. racial differences with regard to patient-provider communication. Sig. differences in HL between White and AA. HL ( $r = -0.089$ , $p = .178$ ) was not a sig. predictor in the final model, neither was race, but amongst others education ( $r = 0.19$ , $p = .01$ ).     | G |
| Hovick, 2014    | Cross-sectional | Racial/Ethnic: White: 50%, AA: 25%, Hispanic: 25%; Education (continuous): high school diploma: 97%; Income (continuous): below US-\$ 20000: 24% | USA | English NVS: continuous                                                     | National online research panel using purposive sampling strategy (N = 1007)                                                 | Cancer risk knowledge; Cancer risk information seeking                                         | HL did not mediate the relationship of SES/race and cancer risk information seeking but it mediated the effects of income, education and race/ethnicity (Hispanic, Black vs. White) on cancer risk knowledge ( $p < .01$ )                                                         | F |
| Bailey, 2009    | Cross-sectional | White: 42%, AA: 58%                                                                                                                              | USA | English REALM: low, marginal, adequate                                      | Adults in three outpatient family medicine clinics in (N = 355)                                                             | Understanding of dosage instructions for a liquid medication commonly prescribed for children  | Inclusion of HL reduced the effect of race on misunderstanding to n.sig.. Marginal (AOR 2.20, 95% CI 1.19–3.97) and inadequate HL (AOR 2.90, 95% CI 1.41–6.00) remained sig. predictors of misunderstanding.                                                                       | F |

(Continued)

Table 1. (Continued)

|                        |                 |         |                                        |                                                                                                                                               |                                                                                                                                                                 |                                                                                                                                        |                                                                                                                                                                                                                                                                                                                                                                           |         |
|------------------------|-----------------|---------|----------------------------------------|-----------------------------------------------------------------------------------------------------------------------------------------------|-----------------------------------------------------------------------------------------------------------------------------------------------------------------|----------------------------------------------------------------------------------------------------------------------------------------|---------------------------------------------------------------------------------------------------------------------------------------------------------------------------------------------------------------------------------------------------------------------------------------------------------------------------------------------------------------------------|---------|
| Osborn, 2007           | Cross-sectional | USA     | White: 54.9%, Black: 45.1%             | English REALM: low ( $\leq$ 6th grade), marginal (7th-8th grade), adequate (9th grade),                                                       | HIV patients on one or more antiretroviral medications at two outpatient infectious disease clinics (N = 204)                                                   | Self-reported HIV-medication adherence                                                                                                 | When HL was included in a regression model the effect of black race on medication adherence was reduced by 25% to non-significant (AOR 1.80, 95% CI 0.51–5.85), low HL remained a significant predictor (AOR 2.12; 95% CI 1.93–2.32)                                                                                                                                      | G       |
| Osborn, 2011           | Cross-sectional | USA     | White: 65%, Black: 35%                 | English REALM, WRAT-3: less than 9th grade, 9th grade or higher; Diabetes Numeracy Test: Quartiles                                            | Adults with type 2 diabetes from two primary care and two diabetes specialty clinics (N = 383)                                                                  | Self-reported diabetes medication adherence                                                                                            | HL was associated with adherence ( $r = .12, p < .02$ ), but diabetes-related numeracy and general numeracy were not associated with adherence. HL diminished the effect of race on adherence to n.sig.                                                                                                                                                                   | G       |
| Waldrop-Valverde, 2010 | Cross-sectional | USA     | Non-AA: 16%, AA: 84%                   | English & Spanish TOFHLA: continuous. English & Spanish applied problems subsets of the Woodcock Johnson—III Tests of Achievement: continuous | HIV patients at HIV care clinics who were enrolled in an AIDS Drug Assistance Program (N = 207)                                                                 | Medication management capacity (mock)                                                                                                  | No significant differences with regard to HL found for different racial groups but for numeracy. Numeracy mediated the effect of race on poor medication management. Numeracy was significantly associated with medication management ( $r = 0.67, p < .001$ )                                                                                                            | G       |
| <b>Gender</b>          |                 |         |                                        |                                                                                                                                               |                                                                                                                                                                 |                                                                                                                                        |                                                                                                                                                                                                                                                                                                                                                                           |         |
| Waldrop-Valverde, 2009 | Cross-sectional | USA     | Men: 58%, Women: 42%                   | English & Spanish TOFHLA: continuous. English & Spanish applied problems subsets of the Woodcock Johnson—III Tests of Achievement: continuous | HIV patients at HIV care clinics who were enrolled in an AIDS Drug Assistance Program and currently received/about to start antiretroviral treatment. (N = 155) | Medication management capacity (mock)                                                                                                  | No significant differences with regard to HL found for gender but for numeracy. Numeracy mediated the relationship between gender and medication management (a: $\beta = -0.428, p < .01$ . b: $\beta = 0.644, p < .05$ )                                                                                                                                                 | G       |
| <b>Disease Control</b> |                 |         |                                        |                                                                                                                                               |                                                                                                                                                                 |                                                                                                                                        |                                                                                                                                                                                                                                                                                                                                                                           |         |
| First Author           | Design          | Country | Participants                           | Instrument; Cut-off points                                                                                                                    | Sample                                                                                                                                                          | Outcomes assessed                                                                                                                      | Associations                                                                                                                                                                                                                                                                                                                                                              | Quality |
| <b>Race/Ethnicity</b>  |                 |         |                                        |                                                                                                                                               |                                                                                                                                                                 |                                                                                                                                        |                                                                                                                                                                                                                                                                                                                                                                           |         |
| Curtis, 2012           | Cohort Study    | USA     | White/Other: 15%, AA: 56%, Latino: 29% | English REALM: limited vs. adequate                                                                                                           | Asthma patients, 18–40 years old: four school sampling groups (N = 348)                                                                                         | Six follow-up interviews on asthma quality of life (AQOL), asthma-related emergency department visits, hospitalization, asthma control | HL reduced effect of race between Latinos and Whites for quality of life and asthma control ( $p < .01$ ) to n.sig. HL reduced the effect of race on disparities between AAs and Whites for asthma control. ER visits and asthma quality of life to n.sig. Only the risk for asthma-related hospitalization for AAs remained (RR = 2.97; 95 CI = 1.09, 8.12; $p = .03$ ). | G       |
| Osborn, 2009           | Cross-sectional | USA     | White: 65%, Black: 35%                 | English REALM, WRAT-3: less than 9th grade, 9th grade or higher; Diabetes Numeracy Test: Quartiles                                            | Adults with type 2 diabetes from two primary care and two diabetes specialty clinics (N = 398)                                                                  | Glycemic control (Chart review: most recent A1C value)                                                                                 | HL and general numeracy n.sig. predictors of glycemic control. Diabetes-related numeracy ( $r = -0.17, p < .01$ ) diminished the effect of AA race on glycemic control to n.sig..                                                                                                                                                                                         | G       |

(Continued)

Table 1. (Continued)

|                                    |                 |                                                |                                                                                                                                        |                                        |                                                                                                                                                                              |                                                                                                                       |                                                                                                                                                                                                                                                                                                                                                                                                                                                                        |                |  |
|------------------------------------|-----------------|------------------------------------------------|----------------------------------------------------------------------------------------------------------------------------------------|----------------------------------------|------------------------------------------------------------------------------------------------------------------------------------------------------------------------------|-----------------------------------------------------------------------------------------------------------------------|------------------------------------------------------------------------------------------------------------------------------------------------------------------------------------------------------------------------------------------------------------------------------------------------------------------------------------------------------------------------------------------------------------------------------------------------------------------------|----------------|--|
| Sperber, 2013                      | RCT             | USA                                            | White: 54%, Black: 43%                                                                                                                 | REALM: low vs. high                    | Participants enrolled in primary care at a VA medical center with diagnosis of hip and/or knee osteoarthritis and persistent, current self-reported joint symptoms (N = 461) | Effects of a 12-months telephone-based osteoarthritis self-management support intervention: <b>Arthritis outcomes</b> | In the telephone-based osteoarthritis (OA) self-management support intervention compared to the usual care arm ( $p < .05$ ) a sig. interaction effect for race and HL on change in pain was found; non-whites with low HL in the intervention had the highest improvement in pain. For mobility, walking and bending, affect, general pain and self-efficacy no sig. effects were found.                                                                              | G              |  |
| <b>Education</b>                   |                 |                                                |                                                                                                                                        |                                        |                                                                                                                                                                              |                                                                                                                       |                                                                                                                                                                                                                                                                                                                                                                                                                                                                        |                |  |
| Pandit, 2009                       | Cross-sectional | USA                                            | grade 1–8: 15.5%, grade 9–11: 15.5%, = high school: 36%, > high school: 33%                                                            | English S-TOPHLA: five categories      | Patients with diagnosed hypertension and scheduled appointments at six primary care safety net clinics (N = 289)                                                             | <b>Hypertension knowledge and control</b>                                                                             | When HL was added to models that included only education, the association between education and knowledge was diminished to n.sig. (Grades 1–8: $\beta = -.30$ , 95% CI -1.44–0.83), whereas the association between education and hypertension control was only minimally reduced (AOR 2.46, 95% CI 2.10–2.88). Limited HL was associated with hypertension control in the final adjusted model (AOR 2.68, 95% CI 1.54–4.70). No sig. interaction effects were found. | G              |  |
| Schillinger, 2006                  | Cross-sectional | USA                                            | <high school graduate: 46.8%, high school graduate or GED: 24.1%, technical school or college attendance or graduation: 29.1%          | English & Spanish S-TOPHLA: continuous | Type 2 diabetes patients from two primary care clinics (N = 395)                                                                                                             | <b>Glycemic control</b> (Chart review: most recent A1C value)                                                         | HL sig. mediated the effect of education on A1C ( $p < .05$ ), the direct association between education and A1c diminished to n.sig..                                                                                                                                                                                                                                                                                                                                  | G              |  |
| <b>Preventive Care<sup>3</sup></b> |                 |                                                |                                                                                                                                        |                                        |                                                                                                                                                                              |                                                                                                                       |                                                                                                                                                                                                                                                                                                                                                                                                                                                                        |                |  |
| <b>First Author</b>                | <b>Design</b>   | <b>Participants</b>                            | <b>Instrument; Cut-off points</b>                                                                                                      | <b>Country</b>                         | <b>Sample</b>                                                                                                                                                                | <b>Outcomes assessed</b>                                                                                              | <b>Associations</b>                                                                                                                                                                                                                                                                                                                                                                                                                                                    | <b>Quality</b> |  |
| Lindau, 2002                       | Cross-sectional | White: 14%, AA: 58%; Hispanic: 18%, Other: 10% | English REALM: inadequate, marginal, adequate                                                                                          | USA                                    | Women in ambulatory women's clinics at an academic medical center (N = 529)                                                                                                  | <b>Cervical cancer screening history and knowledge</b>                                                                | When adjusting for HL, ethnicity was not a sig. predictor of cervical cancer screening knowledge (AOR 2.25; 95% CI, 1.05–4.80). No racial differences with regard to behavioral variables found.                                                                                                                                                                                                                                                                       | F              |  |
| Sentell, 2013                      | Cross-sectional | White: 91% (1% LEP), Asian: 9% (33.5% LEP)     | English, Spanish, Chinese (Mandarin, Cantonese), Korean, and Vietnamese: two subjective proxy measures of health literacy: continuous. | USA                                    | Participants 2007 California Health Interview Survey (CHIS), 50–75 years (N = 15,888)                                                                                        | <b>Compliance with colorectal screening guidelines</b>                                                                | Low HL only was not a sig. predictor among Asians (OR 0.71, 95% CI 0.39–1.28) for meeting colorectal cancer screening guidelines but LEP only was a sig. predictor (OR 0.62, 95% CI 0.38–0.99). Both LEP and low HL was sig. associated with having a lower likelihood of cancer screening (OR 0.50, 95% CI 0.28–0.89).                                                                                                                                                | F              |  |

(Continued)

Table 1. (Continued)

| First Author   | Design                             | Participants                                                                   | Country | End-of-Life Decisions                                                                     |                                                                                                             |                                                                 | Outcomes assessed                                                                                                                                                                                                                                                                                                                                                       | Associations | Quality |
|----------------|------------------------------------|--------------------------------------------------------------------------------|---------|-------------------------------------------------------------------------------------------|-------------------------------------------------------------------------------------------------------------|-----------------------------------------------------------------|-------------------------------------------------------------------------------------------------------------------------------------------------------------------------------------------------------------------------------------------------------------------------------------------------------------------------------------------------------------------------|--------------|---------|
|                |                                    |                                                                                |         | Instrument: Cut-off points                                                                | Sample                                                                                                      | Sample                                                          |                                                                                                                                                                                                                                                                                                                                                                         |              |         |
| Sudore, 2010   | Cross-sectional                    | White: 25%, AA: 24%, Latino: 31%, Asian/Pacific Islander: 9%, Multiracial: 10% | USA     | English & Spanish S-TOFHLA: limited vs. adequate                                          | General medicine outpatients in a county hospital ≥50 years (N = 205)                                       | Decisional uncertainty about making advance treatment decisions | Adjusted analysis: adequate HL (AOR 2.11, 95% CI 1.03–4.33), being Latino (AOR 2.50, 95% CI 1.01–6.16) or Asian-Pacific Islander (AOR 4.25, 95% CI 1.22–14.76) vs. White remained independently associated with uncertainty about treatment (Black was not associated at all). Magnitude of effect of race did not change significantly when HL was added to the model. | F            |         |
| Volandes, 2008 | Cross-sectional experimental study | White: 44%, AA: 56%                                                            | USA     | English REALM: low, marginal, adequate                                                    | Patients scheduled to see a general internist: at six primary care clinics; ≥40 years (N = 144)             | End-of-life care preferences                                    | Before experimental stimulus: Adjusted analysis: HL mediated the relationship between race and end-of-life preferences for African-Americans (Low HL: AOR 7.3, 95% CI 2.1–24.2; Marginal HL: AOR 5.1, 95% CI 1.6–16.3)                                                                                                                                                  | F            |         |
| Waite, 2013    | Cross-sectional                    | White: 56.9% (6.9% "other"), AA: 43.4%                                         | USA     | English TOFHLA: inadequate, marginal, and adequate                                        | Participants at one academic general internal medicine clinic or four health centers: 55–74 years (N = 784) | Having an advance directive                                     | Introduction of HL (low HL: RR 0.45, 95% CI 0.22–0.95) into multivariable model reduced influence of race but AA race remained sig. associated (RR 0.64, 95% CI 0.47–0.88) with having an advance directive.                                                                                                                                                            | G            |         |
| First Author   | Design                             | Participants                                                                   | Country | Instrument: Cut-off points                                                                | Sample                                                                                                      | Outcomes assessed                                               | Associations                                                                                                                                                                                                                                                                                                                                                            | Quality      |         |
| Bains, 2011    | Cross-sectional                    | White: 56%, AA: 41%, Hispanic/Other: 3%                                        | USA     | English REALM-R: inadequate vs. adequate                                                  | Patients at an adult primary care clinic (N = 347)                                                          | Usage of complementary and alternative medicine (CAM)           | Sig. interaction between race and HL. Whites with adequate HL were more likely to use CAM (adjusted OR 9.42, 95% CI: 1.66–53.5, $p = .01$ ) but in AAs adequate HL was not sig. related to CAM usage (adjusted OR 0.97, 95% CI: 0.27–3.48).                                                                                                                             | F            |         |
| Langford, 2012 | Cross-sectional                    | White: 81%, Black: 10%, Hispanic: 9%                                           | USA     | English & Spanish Numeracy: three subjective measurements (HINTS 2007); Likert-type scale | Health Information National Trends Survey (HINTS): nationally representative sample (N = 6,754)             | Awareness of Direct-to-consumer (DTC) genetic tests             | When two numeracy variables were added to the model, the effect of black (vs. white) was no longer sig. (OR = 0.84; CI 0.69–1.04). Hispanics did not sig. differ from Whites with regard to DTC genetic tests awareness. No sign. interaction of race/ethnicity with SES and numeracy variables DTC genetic tests awareness.                                            | F            |         |

(Continued)

Table 1. (Continued)

|               |                 |          |                                                                                                                                        |                                                                                                                                |                                                                                                         |   |
|---------------|-----------------|----------|----------------------------------------------------------------------------------------------------------------------------------------|--------------------------------------------------------------------------------------------------------------------------------|---------------------------------------------------------------------------------------------------------|---|
| Smith, 2012   | Cross-sectional | USA      | English & Spanish<br>TOFHLA: low, medium, high                                                                                         | Patients in an ED who had received instructions for a follow-up appointment and/or medication refill within one week (N = 100) | Adherence to ED discharge instructions                                                                  | P |
| Gardner, 2013 | Cross-sectional | USA      | English REALM: low vs. high                                                                                                            | Patients in an inner-city hospital (N = 581)                                                                                   | Usage of complementary and alternative medicine (CAM)                                                   | F |
| Mottus, 2014  | Cross-sectional | Scotland | British versions of REALM, S-TOFHLA passage B, NVS: all continuous combined into a latent HL factor                                    | Lothian Birth Cohort 1936 –participants at around age 73 years (N = 730)                                                       | Three objective health outcomes in older people: General physical fitness; BMI; Number of natural teeth | G |
| Yin, 2009     | Cross-sectional | USA      | English & Spanish NAAL health literacy scale: 13 out of 28 health-related literacy tasks: Below basic, Basic, Intermediate, Proficient | Parents of children—nationally representative sample (N = 6,100)                                                               | Child health insurance status; Difficulty understanding OTC-medication labels; Food label use           | F |

Significant (sig.); Non-significant (n.sig.); Limited English Proficiency (LEP); African-American (AA); Categorizations of race/ethnicity reported as in the studies.

<sup>1</sup> Chew et al., [28]

<sup>2</sup> Yin et al. [48] reported on “Medication Adherence & Management” and “Other Outcomes”.

<sup>3</sup> Bennett, Chen, Soroui, & White, S. (2009); Howard, Sentell, & Gazmararian (2006) reported on “Self-reported Health Status” and “Preventive Care”

significant interaction effect between health literacy and ethnicity on self-reported anxiety/depression [37].

Only one study from the Netherlands looked specifically into educational disparities, and discovered that health literacy partially mediated the relationship between education and self-reported general health [38].

## Cancer-related outcomes

Six studies investigated how health literacy might explain disparities in cancer-related outcomes. Three studies looked into the effect of race/ethnicity (black vs. white) and health literacy in prostate cancer patients [39–41]. One study found that, after adjustment, race/ethnicity and health literacy were no longer significant predictors of presentation with advanced stage prostate cancer [39], whereas another study found that health literacy contributed to a reduction of 35% in the association between race/ethnicity and prostate-specific antigen levels [41]. With regard to disparities in patient-provider communication in a sample of patients with prostate cancer, Song and colleagues [40] did not find any significant relationship between race/ethnicity and health literacy and in the final model health literacy was not a significant predictor.

An additional two studies found that education was a more important predictor for information needs in newly diagnosed cancer patients [42] and cancer risk information seeking [43] than health literacy. Yet, health literacy was a significant mediator between SES and race/ethnicity on cancer risk knowledge [43].

One study investigated how health literacy might influence racial/ethnic differences (black vs. Hispanic vs. white) in female patients' knowledge about their breast cancer characteristics, and found that health literacy did not eliminate most of the racial/ethnic differences under investigation. However, health literacy reduced differences between White and Hispanic women for being accurately knowledgeable about their breast cancer characteristics [44].

## Medication adherence & management

Health literacy mediated the effect of race/ethnicity (black vs. white) on HIV and diabetes medication adherence in two studies. However, the studies did not find a significant relationship between diabetes-specific and general numeracy on medication adherence [45, 46]. In another study, the inclusion of health literacy as a predictor reduced the effect of race/ethnicity (black vs. white) on understanding of dosage instructions for pediatric liquid medication [47]. These results concur with Yin and colleagues [48] results, where after including health literacy in the final model, neither race/ethnicity, nor education or income predicted the understanding of OTC medication labels.

Yet two other studies discovered that numeracy mediated the effect of race/ethnicity (black vs. white) and gender on medication management capacities in HIV patients [49, 50].

## Disease control

Five studies looked into disease control (e.g. asthma-related hospitalizations or glycemic control in diabetes patients). One study found that diabetes related numeracy diminished the effect of race/ethnicity (black vs. white) on glycemic control to a level of non-significance. However general health literacy or numeracy were no significant predictors of glycemic control [51]. Another study demonstrated that health literacy reduced the effect of race/ethnicity in African-Americans and Hispanics on asthma quality of life and asthma control, and for African-Americans only on emergency department visits. However, differences between Afro-Americans and Whites for asthma-related hospitalizations remained [52].



Overall only one experimental study looked at the differential effects of race/ethnicity (black vs. white) and health literacy. The telephone-based osteoarthritis (OA) self-management support intervention found a significant interaction effect between health literacy and race/ethnicity on change in pain. Non-Whites with low health literacy had the highest improvement in pain in the intervention group compared to the usual care group [53].

Two studies looked into educational disparities. Whereas in one study health literacy significantly mediated the effect of education on glycemic control [8], in the other study health literacy reduced only minimally the effect of education on hypertension control but reduced it to non-significance for hypertension knowledge [54].

### Preventive care

Three studies investigated the influence of health literacy on cancer screening behavior and knowledge. One study did not find significant racial/ethnic (black vs. Hispanic vs. white vs. other) differences with regard to behavioral variables. Yet, after adjusting for health literacy, race/ethnicity was no longer a significant predictor of cervical cancer screening knowledge [55]. Another study in Asian Americans found that low health literacy was not significantly associated with meeting colorectal cancer screening guidelines in the Asian group. LEP was a more important predictor, as well as the combination of LEP and low health literacy [56].

Bennett and colleagues [30] discovered that health literacy mediated the relationship between education and receipt of a mammography. Also, they found that it mediated the effect of educational disparities on dental care and educational and racial disparities on receipt of influenza vaccine.

One study looked into receipt of vaccinations, in which health literacy reduced the influence of race/ethnicity and education on vaccination receipts only minimally [31].

### End-of-life decisions

Three studies investigated the relationship between health literacy and end of life related decisions. One study found that, before an experimental stimulus was introduced to the participants, health literacy reduced the association between race and end-of-life preference to non-significance [57]. On the other hand, in two other studies, even though health literacy was significantly associated with decisional uncertainty about making an advance treatment decision [58] or having an advance directive [59], it did not significantly reduce the effect of race/ethnicity.

### Other health outcomes

Two studies looked into racial/ethnic disparities (black vs. Hispanic/other vs. white) in the usage of complementary and alternative medicine (CAM), and both found a significant interaction effect between race/ethnicity and health literacy. In both studies, Whites with higher levels of health literacy were more likely to use any kind of CAM [60, 61]. Gardiner and colleagues [61] identified the same effect in Hispanics, as well as a higher likelihood to use provider-delivered therapies. This was not the case for the relationship in black participants.

One study looked into how numeracy was related to direct-to-consumer genetic testing, in which the addition of numeracy to the final model reduced the effect of black race to non-significance. On the other hand, Hispanics did not significantly differ from White participants. There were no significant interactions between race/ethnicity and numeracy [62].

Overall, this review identified only one study that evaluated the relationship between health literacy and physiological outcomes as an indicator of general health status. The study, conducted in an elderly population in Scotland, found that health literacy was linked to worse



health outcomes. However, educational and occupational level, as well as cognitive abilities accounted for most of the relationships. Only physical fitness was significantly related to health literacy after adjusting for educational and occupational level and other variables [63].

Yin and colleagues [48] investigated in how far parents' health literacy mediated the effect of a variety of potential disparities on outcomes relevant to their children. However, after the inclusion of health literacy in the final model, the association of race/ethnicity and health insurance status was no longer significant. As already described above, only understanding of OTC medication labels was significantly associated with parents' below basic health literacy.

Another study compared Spanish- to English-speakers in an emergency department and concluded that the former were less likely to keep up follow-up appointments if they had lower health literacy [64].

## Discussion

In the conceptual literature health literacy is commonly described as a contributing factor to health disparities but little is known about its actual contribution and potential role in the relationship between social and health disparities. This review identified overall 36 studies that have investigated this relationship. Most of these studies focused on racial/ethnic disparities, followed by some few studies that systematically looked into educational disparities. Only one study specifically investigated the contribution of health literacy on potential gender differences in health.

Given that nearly all studies were conducted in the US, the large focus on racial/ethnic disparities in the identified studies is not surprising. Race/ethnicity is often an assumed proxy for other variables. Whether race is a biological category as such, an indication of socioeconomic status or an independent predictor in which socioeconomic status solely is a mediator, studies on health disparities in the US have largely used race/ethnicity as a predictor of health outcomes [65].

Overall the review showed that the evidence on the role of health literacy on disparities is still mixed and, for most outcomes, very limited. Even though race/ethnicity was a commonly investigated social disparity, outcomes under investigation and measurements largely varied in the identified studies. Thus, making direct comparisons between different studies rather difficult. There were no evident patterns on whether some health literacy measures were more predictive than others in the relationships under investigation. As suggested for clinical settings, measures of functional health literacy, such as the REALM or the S-TOFHLA, had been most frequently used when evaluating the relationship in patients. On the other hand, when investigating the relationship in population-based data, relatively often subjective health literacy measures were used.

Overall, some very limited evidence was found on the mediating function of health literacy on self-rated health status when looking into educational disparities. Further, some evidence was identified on the role of health literacy as an independent predictor of health status across different racial/ethnic groups, which showed to be a constant relationship independently from health literacy measures used. However, results need to be carefully evaluated given that the racial/ethnic groups under investigation largely varied from one study to another. There was also some limited evidence of the potential effect of health literacy, in particular numeracy, on reducing racial/ethnic disparities on medication adherence and understanding of its intake. Further, some evidence was found on the effect of health literacy on knowledge-related outcomes.

With regard to cancer-related outcomes, the included studies yet failed to show any patterns. Four out of six studies did not find health literacy to be a significant predictor in the relationships under investigation.

Part of the explanation for the differences found for self-reported health status on the one side and cancer-related outcomes on the other side, might lie in the fact that some of the cancer-related outcomes were not related to actual health outcomes but related concepts, such as information seeking/needs, presentation stage or doctor-patient communication. This in turn might be related to other, in this case, more important mediating mechanisms, such as self-efficacy for instance [66–68]. The role of other mediating mechanisms indeed has to be carefully evaluated. This review found, for example, that in the case of immigrants language proficiency was more important in predicting differences in health than health literacy. Other studies, even though not with the focus on examining health disparities, have found similar patterns when scrutinizing the relationship between health literacy and health(-related) outcomes and found that other variables, such as the above-mentioned self-efficacy or knowledge were indeed important mediating variables [69–71].

Even though two independent reviewers rated the quality of most studies as “fair”, there are still some limitations that are inherent to a number of the included studies. Overall, most of the data sets that had been used in the studies originally had not been collected to investigate the relationship between health literacy and disparities per se, but also to investigate a variety of other relationships. Hence, some of the results presented in these studies initially might have been of secondary interest and were not necessarily built on previous results and literature. This might explain some of the incongruences between the different studies. Further, from a conceptual perspective, studies often neglected to sufficiently describe the disparity under investigation. General assumptions were made on how health literacy should contribute to disparities but the disparity as such was often only vaguely described. Moreover, descriptions of the disparities under investigation often primarily focused on discussing health literacy as a social determinant of the disparity tested. Even though the conclusion that health literacy might be a determinant per se in this relationship is certainly not wrong, it does not sufficiently take the possible pathways on how health literacy influences health disparities into account. This is also mirrored in the fact that only few studies tested for predefined hypotheses, in which the possible pathways were described. A couple of studies made assumptions about its mediator role, testing for it by using appropriate analysis techniques, including mediation analysis and estimating structural equation models. Other studies tested its potential moderator role and tested, for example, for interaction effects. Still, in most of these studies the potential role of health literacy was not specifically predefined and left a lot of room for interpretation.

Potential pathways might distinguish between social disparities, including race, income or education, and a potential “health literacy disparity” as such (Fig 3), thereby trying to identify not only research gaps but also potential leverage points for interventions that aim at reducing disparities. It is indeed here that the conceptualization and measurement of health literacy might need to move beyond the functional dimension, and instead focus more systematically on other dimensions such as interactive and critical literacy [72]. By taking these dimensions into account, one would be able to identify crucial points that are key to, for example, accessing and processing health services and information needed. This also has implications from an interventionist point of view. It would provide clear indications on how and where to increase efforts to reduce health disparities by means of health literacy related interventions, such as providing simplified access to information or support during health-related decision making.

## Limitations

The synthesis presented in this review needs to be carefully evaluated. Studies included in this review used different health literacy measures, cut-off points and analysis techniques, which

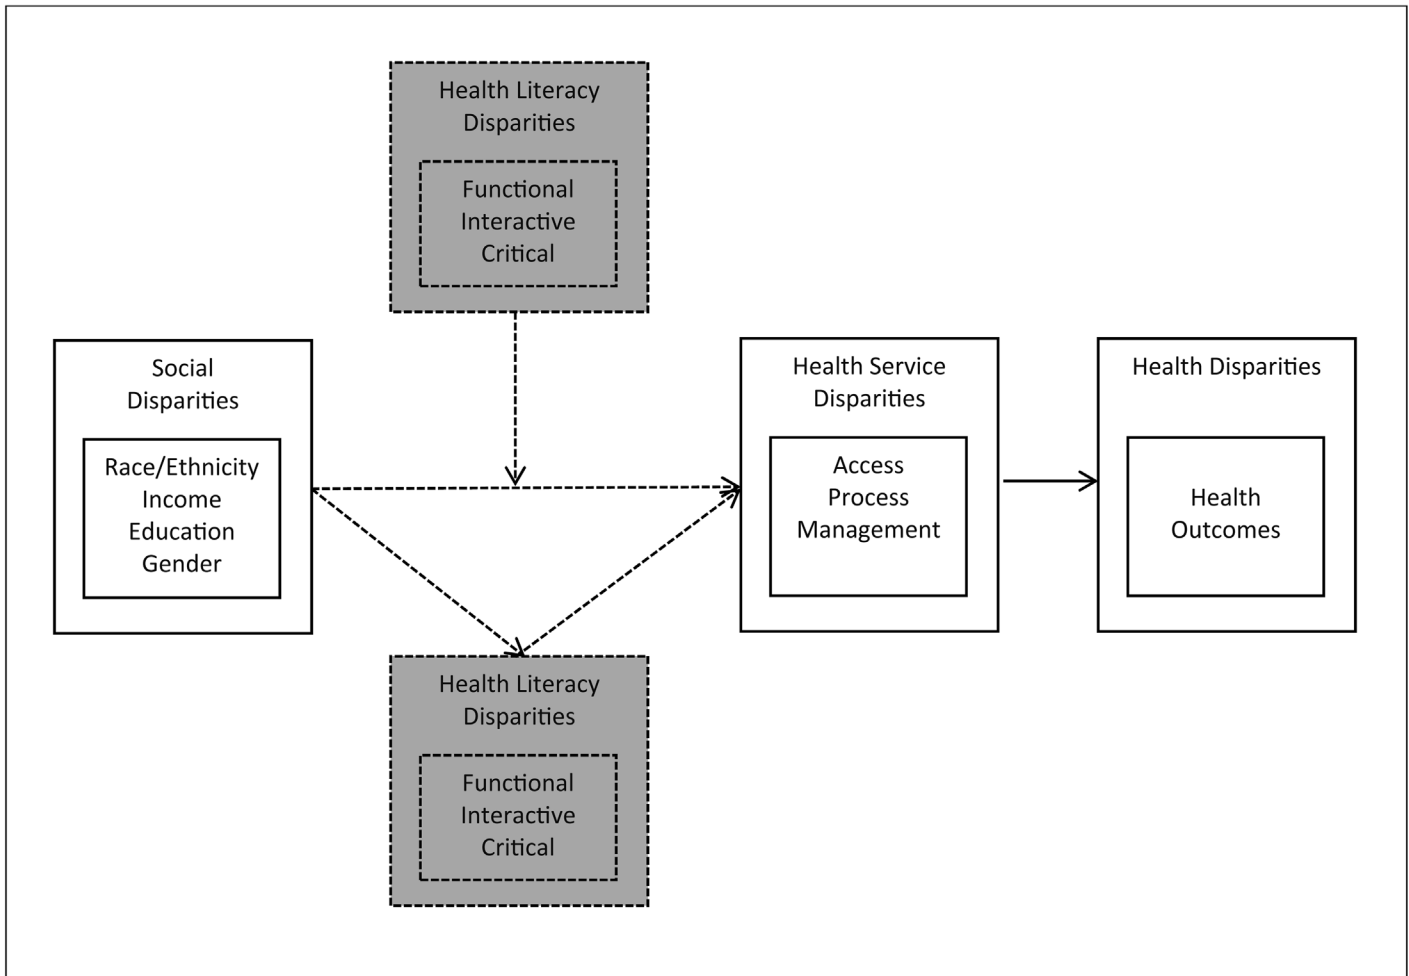

**Fig 3. Possible pathways on how health literacy explains disparities in health outcomes.**

doi:10.1371/journal.pone.0145455.g003

made comparability sometimes difficult. Further, even though all studies sufficiently controlled for covariates, there are still inconsistencies between studies. Due to this heterogeneity it was not possible to perform a meta-analysis. Also, despite the attempt to be as comprehensive as possible in the search strategy, some studies might not have been included in this review. Moreover, the search was limited to already published material, thus potentially missing any work that is currently in preparation or under evaluation for publication.

Included in the review were only studies that explicitly acknowledged the disparity under investigation, therefore ignoring any study that evaluated the relationship between literacy and disparity as a secondary outcome. Future reviews might therefore need to focus on smaller characteristics, such as race/ethnicity or education, to fully grasp the relationships leading to health disparities. In addition, as the field of health literacy is still evolving, consensus on which dimensions should be included when assessing health literacy is still lacking. Therefore, studies that primarily assessed health knowledge, including mental health literacy, were excluded. Only studies that explicitly acknowledged health literacy and included a valid measure of health literacy were included.

## Conclusions

Evidence on the exact nature of the relationship between health literacy and health disparities remains still scarce. Most studies identified in this review focused on racial/ethnic disparities, being a proxy for other important predictors of health disparities. Some limited evidence was found on the role of health literacy in mediating educational and racial/ethnic disparities with regard to self-reported health status. Also, some evidence was found on its role as a mediator between racial/ethnic disparities and medication management/adherence and health knowledge. Only few studies tested for hypothesized pathways and systematically scrutinized the relationship between health literacy and health disparities. There is a need to systematically conceptualize the pathways that link health literacy to health disparities and to address whether other social disparities interfere with this relationship. Especially longitudinal studies would shed more light on the potential causal pathways explaining the potential mediating function of health literacy and other mediating variables on health disparities. More rigorous studies are needed that not only clearly define the disparity but also the groups under investigation, by choosing an appropriate reference group and potentially holding other social factors constant between these groups.

## Supporting Information

### S1 Appendix. PRISMA Checklist.

(DOC)

### S2 Appendix. Full search strategy PubMed/Medline.

(TIFF)

## Author Contributions

Conceived and designed the experiments: SM PJS. Analyzed the data: SM SMU. Wrote the paper: SM SMU PJS.

## References

1. U.S. Department of Health and Human Services (HHS), Office of Disease Prevention and Health Promotion. (2010). Healthy People 2020—Disparities. Washington, DC. Available: <http://www.healthypeople.gov/2020/about/foundation-health-measures/Disparities>. Accessed 20 August 2015
2. Braveman PA. Health disparities and health equity: concepts and measurement. *Annu Rev Public Health*. 2006; 27: 167–194. PMID: [16533114](#)
3. Keppel K, Pamuk E, Lynch J, Carter-Pokras O, Kim I, Mays V, et al. Methodological issues in measuring health disparities. *Vital and Health Stat. Series 2, Data evaluation and methods research*. 2005; 141:1.
4. Braveman PA, Cubbin C, Egerter S, Williams DR, Pamuk E. Socioeconomic disparities in health in the United States: what the patterns tell us. *Am J Public Health*. 2010; 100: 186–196.
5. Kennedy BP, Kawachi I, Glass R, Prothrow-Stith D. Income distribution, socioeconomic status, and self-rated health in the United States: multilevel analysis. *Bmj*. 1998; 317: 917–921. PMID: [9756809](#)
6. Nielsen-Bohlman L, Panzer AM, Kindig DA. Health literacy: a prescription to end confusion. Committee on Health Literacy, Board on Neuroscience and Behavioral Health. Institute of Medicine; 2004.
7. Baker DW. Reading between the lines. *J Gen Intern Med*. 1999; 14: 315–317. PMID: [10337042](#)
8. Schillinger D, Barton LR, Karter AJ, Wang F, Adler N. Does literacy mediate the relationship between education and health outcomes? A study of a low-income population with diabetes. *Public Health Rep*. 2006; 121: 245–254. PMID: [16640146](#)
9. Berkman ND, Sheridan SL, Donahue KE, Halpern DJ, Crotty K. Low health literacy and health outcomes: an updated systematic review. *Ann Intern Med*. 2011; 155: 97–107. doi: [10.7326/0003-4819-155-2-201107190-00005](#) PMID: [21768583](#)

10. Kutner M, Greenburg E, Jin Y, Paulsen C. The Health Literacy of America's Adults: Results from the 2003 National Assessment of Adult Literacy. NCEES 2006–483. National Center for Education Statistics; 2006.
11. Wolf MS, Gazmararian JA, Baker DW. Health literacy and functional health status among older adults. *Arch Intern Med.* 2005; 165: 1946–1952. PMID: [16186463](#)
12. Baker DW, Gazmararian JA, Williams MV, Scott T, Parker RM, Green D, et al. Functional health literacy and the risk of hospital admission among Medicare managed care enrollees. *Am J Public Health.* 2002; 92: 1278–1283. PMID: [12144984](#)
13. von Wagner C, Knight K, Steptoe A, Wardle J. Functional health literacy and health-promoting behaviour in a national sample of British adults. *J Epidemiol Community Health.* 2007; 61: 1086–1090. PMID: [18000132](#)
14. Koh HK, Berwick DM, Clancy CM, Baur C, Brach C, Harris LM, et al. New federal policy initiatives to boost health literacy can help the nation move beyond the cycle of costly 'crisis care'. *Health Aff (Millwood).* 2012; 31: doi: [10.1377/hlthaff.2011.1169](#)
15. National Institutes of Health. *NIH health disparities strategic plan and budget fiscal years 2009–2013.* Washington (DC): US Department of Health and Human Services; 2009. Available: [http://www.nlm.nih.gov/about\\_ncmhd/NIH%20Health%20Disparities%20Strategic%20Plan%20and%20Budget%202009-2013.pdf](http://www.nlm.nih.gov/about_ncmhd/NIH%20Health%20Disparities%20Strategic%20Plan%20and%20Budget%202009-2013.pdf). Accessed 20 August 2015.
16. Moher D, Liberati A, Tetzlaff J, Altman DG. Preferred reporting items for systematic reviews and meta-analyses: the PRISMA statement. *Ann Intern Med.* 2009; 151: 264–269. PMID: [19622511](#)
17. Rothman RL, Montori VM, Cherrington A, Pignone MP. Perspective: the role of numeracy in health care. *J Health Commun.* 2008; 13: 583–595. doi: [10.1080/10810730802281791](#) PMID: [18726814](#)
18. Braveman PA. What are health disparities and health equity? We need to be clear. *Public Health Rep.* 2014; 129: 5.
19. Bakker JP, O'Keefe KM, Neill AM, Campbell AJ. Ethnic disparities in CPAP adherence in New Zealand: effects of socioeconomic status, health literacy and self-efficacy. *Sleep.* 2011; 34: 1595. doi: [10.5665/sleep.1404](#) PMID: [22043130](#)
20. Chakkalakal RJ, Kripalani S, Schlundt DG, Elasy TA, Osborn CY. Disparities in using technology to access health information: race versus health literacy. *Diabetes Care.* 2014; 37: 53–54.
21. Chaudhry SI, Herrin J, Phillips C, Butler J, Mukerjee S, Murillo J, et al. Racial disparities in health literacy and access to care among patients with heart failure. *J Card Fail.* 2011; 17: 122–127. doi: [10.1016/j.cardfail.2010.09.016](#) PMID: [21300301](#)
22. Kaphingst KA, Stafford JD, McGowan LDA, Seo J, Lachance CR, Goodman MS. Effects of racial and ethnic group and health literacy on responses to genomic risk information in a medically underserved population. *Health Psychol.* 2015; 34: 101. doi: [10.1037/hea0000177](#) PMID: [25622080](#)
23. Sarkar U, Karter AJ, Liu JY, Adler NE, Nguyen R, López A, et al. The literacy divide: health literacy and the use of an internet-based patient portal in an integrated health system—results from the Diabetes Study of Northern California (DISTANCE) *J Health Commun.* 2010; 15: 183–196. doi: [10.1080/10810730.2010.499988](#) PMID: [20845203](#)
24. Sudore RL, Mehta KM, Simonsick EM, Harris TB, Newman AB, Satterfield S, et al. Limited literacy in older people and disparities in health and healthcare access. *J Am Geriatr Soc.* 2006; 54: 770–776. PMID: [16696742](#)
25. Davis TC, Long SW, Jackson RH, Mayeaux EJ, George RB, Murphy PW, et al. Rapid estimate of adult literacy in medicine: a shortened screening instrument. *Fam Med.* 1993; 25: 391–395. PMID: [8349060](#)
26. Baker DW, Williams MV, Parker RM, Gazmararian JA, Nurss J. Development of a brief test to measure functional health literacy. *Patient Educ Couns.* 1999; 38: 33–42. PMID: [14528569](#)
27. Rudd RE. Health literacy skills of US adults. *Am J Health Behav.* 2007; 31: 8–18.
28. Chew LD, Griffin JM, Partin MR, Noorbaloochi S, Grill JP, Snyder A, et al. Validation of screening questions for limited health literacy in a large VA outpatient population. *J Gen Intern Med.* 2008; 23: 561–566. doi: [10.1007/s11606-008-0520-5](#) PMID: [18335281](#)
29. Weiss BD, Mays MZ, Martz W, Castro KM, DeWalt DA, Pignone MP, et al. Quick assessment of literacy in primary care: the newest vital sign. *Ann Fam Med.* 2005; 3: 514–522. PMID: [16338915](#)
30. Bennett IM, Chen J, Soroui JS, White S. The contribution of health literacy to disparities in self-rated health status and preventive health behaviors in older adults. *Ann Fam Med.* 2009; 7: 204–211. doi: [10.1370/afm.940](#) PMID: [19433837](#)
31. Howard DH, Sentell T, Gazmararian JA. Impact of health literacy on socioeconomic and racial differences in health in an elderly population. *J Gen Intern Med.* 2006; 21: 857–861. PMID: [16881947](#)

32. Lee HY, Rhee TG, Kim NK, Ahluwalia JS. Health literacy as a social determinant of health in asian american immigrants: findings from population-based survey in California. *J Gen Intern Med*. 2015; 30: 1118–1124. doi: [10.1007/s11606-015-3217-6](https://doi.org/10.1007/s11606-015-3217-6) PMID: [25715993](https://pubmed.ncbi.nlm.nih.gov/25715993/)
33. Sentell T, Baker KK, Onaka A, Braun K. Low health literacy and poor health status in Asian Americans and Pacific Islanders in Hawai'i. *J Health Commun*. 2011; 16: 279–294. doi: [10.1080/10810730.2011.604390](https://doi.org/10.1080/10810730.2011.604390) PMID: [21951258](https://pubmed.ncbi.nlm.nih.gov/21951258/)
34. Sentell T, Braun KL. Low health literacy, limited English proficiency, and health status in Asians, Latinos, and other racial/ethnic groups in California. *J Health Commun*. 2012; 17: 82–99.
35. Omariba DWR, Ng E. Immigration, generation and self-rated health in Canada: On the role of health literacy. *Can J Public Health*. 2011; 102: 281–285. PMID: [21913583](https://pubmed.ncbi.nlm.nih.gov/21913583/)
36. Omariba DWR, Ng E. Health literacy and disability: differences between generations of Canadian immigrants. *Int J Public Health*. 2014; 60: 389–397. doi: [10.1007/s00038-014-0640-0](https://doi.org/10.1007/s00038-014-0640-0) PMID: [25549612](https://pubmed.ncbi.nlm.nih.gov/25549612/)
37. Wang C, Li H, Li L, Xu D, Kane RL, Meng Q. Health literacy and ethnic disparities in health-related quality of life among rural women: results from a Chinese poor minority area. *Health Qual Life Outcomes*. 2013; 11: 153. doi: [10.1186/1477-7525-11-153](https://doi.org/10.1186/1477-7525-11-153) PMID: [24020618](https://pubmed.ncbi.nlm.nih.gov/24020618/)
38. van der Heide I, Wang J, Droomers M, Spreuwenberg P, Rademakers J, Uiters E. The relationship between health, education, and health literacy: results from the Dutch adult literacy and life skills survey. *J Health Commun*. 2013; 18: 172–184. doi: [10.1080/10810730.2013.825668](https://doi.org/10.1080/10810730.2013.825668) PMID: [24093354](https://pubmed.ncbi.nlm.nih.gov/24093354/)
39. Bennett CL, Ferreira MR, Davis TC, Kaplan J, Weinberger M, Kuzel T, et al. Relation between literacy, race, and stage of presentation among low-income patients with prostate cancer. *J Clin Oncol*. 1998; 16: 3101–3104. PMID: [9738581](https://pubmed.ncbi.nlm.nih.gov/9738581/)
40. Song L, Weaver MA, Chen RC, Bensen JT, Fontham E, Mohler JL. Associations between patient–provider communication and socio-cultural factors in prostate cancer patients: A cross-sectional evaluation of racial differences. *Patient Educ Couns*. 2014; 97: 339–346. doi: [10.1016/j.pec.2014.08.019](https://doi.org/10.1016/j.pec.2014.08.019) PMID: [25224313](https://pubmed.ncbi.nlm.nih.gov/25224313/)
41. Wolf MS, Knight SJ, Lyons EA, Durazo-Arvizu R, Pickard SA, Arseven A, et al. Literacy, race, and PSA level among low-income men newly diagnosed with prostate cancer. *Urology*. 2006; 68: 89–93. PMID: [16844451](https://pubmed.ncbi.nlm.nih.gov/16844451/)
42. Matsuyama RK, Wilson-Genderson M, Kuhn L, Moghanaki D, Vachhani H, Paasche-Orlow MK. Education level, not health literacy, associated with information needs for patients with cancer. *Educ Couns*. 2011; 85: 229–236.
43. Hovick SR, Liang MC, Kahlor L. Predicting Cancer Risk Knowledge and Information Seeking: The Role of Social and Cognitive Factors. *Health Commun*. 2014; 29: 656–668. doi: [10.1080/10410236.2012.763204](https://doi.org/10.1080/10410236.2012.763204) PMID: [24093914](https://pubmed.ncbi.nlm.nih.gov/24093914/)
44. Freedman RA, Kouri EM, West DW, Keating NL. Racial/ethnic disparities in knowledge about one's breast cancer characteristics. *Cancer*. 2015; 121: 724–732. doi: [10.1002/ncr.28977](https://doi.org/10.1002/ncr.28977) PMID: [25624186](https://pubmed.ncbi.nlm.nih.gov/25624186/)
45. Osborn CY, Paasche-Orlow MK, Davis TC, Wolf MS. Health literacy: an overlooked factor in understanding HIV health disparities. *Am J Prev Med*. 2007; 33: 374–378. PMID: [17950402](https://pubmed.ncbi.nlm.nih.gov/17950402/)
46. Osborn CY, Cavanaugh K, Wallston KA, Kripalani S, Elasy TA, Rothman RL, et al. Health literacy explains racial disparities in diabetes medication adherence. *J Health Commun*. 2011; 16: 268–278. doi: [10.1080/10810730.2011.604388](https://doi.org/10.1080/10810730.2011.604388) PMID: [21951257](https://pubmed.ncbi.nlm.nih.gov/21951257/)
47. Bailey SC, Pandit AU, Yin S, Federman A, Davis TC, Parker RM, et al. Predictors of misunderstanding pediatric liquid medication instructions *Fam Med*. 2009; 41: 715–21.
48. Yin HS, Johnson M, Mendelsohn AL, Abrams MA, Sanders LM, Dreyer BP. The health literacy of parents in the United States: a nationally representative study. *Pediatrics*. 2009; 124: 289–298.
49. Waldrop-Valverde D, Jones DL, Jayaweera D, Gonzalez P, Romero J, Ownby RL. Gender differences in medication management capacity in HIV infection: the role of health literacy and numeracy. *AIDS Behav*. 2009; 13: 46–52. doi: [10.1007/s10461-008-9425-x](https://doi.org/10.1007/s10461-008-9425-x) PMID: [18618237](https://pubmed.ncbi.nlm.nih.gov/18618237/)
50. Waldrop-Valverde D, Osborn CY, Rodriguez A, Rothman RL, Kumar M, Jones DL. Numeracy skills explain racial differences in HIV medication management. *AIDS Behav*. 2010; 14: 799–806. doi: [10.1007/s10461-009-9604-4](https://doi.org/10.1007/s10461-009-9604-4) PMID: [19669403](https://pubmed.ncbi.nlm.nih.gov/19669403/)
51. Osborn CY, Cavanaugh K, Wallston KA, White RO, Rothman RL. Diabetes Numeracy An overlooked factor in understanding racial disparities in glycemic control. *Diabetes Care*. 2009; 32: 1614–1619. doi: [10.2337/dc09-0425](https://doi.org/10.2337/dc09-0425) PMID: [19401443](https://pubmed.ncbi.nlm.nih.gov/19401443/)
52. Curtis LM, Wolf MS, Weiss KB, Grammer LC. The impact of health literacy and socioeconomic status on asthma disparities. *J Asthma*. 2012; 49: 178–183. doi: [10.3109/02770903.2011.648297](https://doi.org/10.3109/02770903.2011.648297) PMID: [22277072](https://pubmed.ncbi.nlm.nih.gov/22277072/)



53. Sperber NR, Bosworth HB, Coffman CJ, Lindquist JH, Oddone EZ, Weinberger M, et al. Differences in osteoarthritis self-management support intervention outcomes according to race and health literacy. *Health Educ Res.* 2013; 28: doi: [10.1093/her/cyt043](https://doi.org/10.1093/her/cyt043)
54. Pandit AU, Tang JW, Bailey SC, Davis TC, Bocchini MV, Persell SD, et al. Education, literacy, and health: Mediating effects on hypertension knowledge and control. *Patient Educ Couns.* 2009; 75: 381–385. doi: [10.1016/j.pec.2009.04.006](https://doi.org/10.1016/j.pec.2009.04.006) PMID: [19442477](https://pubmed.ncbi.nlm.nih.gov/19442477/)
55. Lindau ST, Tomori C, Lyons T, Langseth L, Bennett CL, Garcia P. The association of health literacy with cervical cancer prevention knowledge and health behaviors in a multiethnic cohort of women. *Am J Obstet Gynecol.* 2002; 186: 938–943. PMID: [12015518](https://pubmed.ncbi.nlm.nih.gov/12015518/)
56. Sentell T, Braun KL, Davis J, Davis T. Colorectal cancer screening: low health literacy and limited English proficiency among Asians and Whites in California. *J Health Commun.* 2013; 18: 242–255. doi: [10.1080/10810730.2013.825669](https://doi.org/10.1080/10810730.2013.825669) PMID: [24093359](https://pubmed.ncbi.nlm.nih.gov/24093359/)
57. Volandes AE, Paasche-Orlow MK, Gillick MR, Cook EF, Shaykevich S, Abbo ED, et al. Health literacy not race predicts end-of-life care preferences. *J Palliat Med.* 2008; 11: 754–762. doi: [10.1089/jpm.2007.0224](https://doi.org/10.1089/jpm.2007.0224) PMID: [18588408](https://pubmed.ncbi.nlm.nih.gov/18588408/)
58. Sudore RL, Schillinger D, Knight SJ, Fried TR. Uncertainty about advance care planning treatment preferences among diverse older adults. *J Health Commun.* 2010; 15: 159–171. doi: [10.1080/10810730.2010.499982](https://doi.org/10.1080/10810730.2010.499982) PMID: [20845201](https://pubmed.ncbi.nlm.nih.gov/20845201/)
59. Waite KR, Federman AD, McCarthy DM, Sudore R, Curtis LM, Baker DW, et al. Literacy and race as risk factors for low rates of advance directives in older adults. *J Am Geriatr Soc.* 2013; 61: 403–406. doi: [10.1111/jgs.12134](https://doi.org/10.1111/jgs.12134) PMID: [23379361](https://pubmed.ncbi.nlm.nih.gov/23379361/)
60. Bains SS, Egede LE. Association of health literacy with complementary and alternative medicine use: A cross-sectional study in adult primary care patients. *BMC Complement Altern Med.* 2011; 11: 138. doi: [10.1186/1472-6882-11-138](https://doi.org/10.1186/1472-6882-11-138) PMID: [22208873](https://pubmed.ncbi.nlm.nih.gov/22208873/)
61. Gardiner P, Mitchell S, Filippelli AC, Sadikova E, White LF, Paasche-Orlow MK, et al. Health literacy and complementary and alternative medicine use among underserved inpatients in a safety net hospital. *J Health Commun.* 2013; 18: 290–297. doi: [10.1080/10810730.2013.830663](https://doi.org/10.1080/10810730.2013.830663) PMID: [24093362](https://pubmed.ncbi.nlm.nih.gov/24093362/)
62. Langford AT, Resnicow K, Roberts JS, Zikmund-Fisher BJ. Racial and ethnic differences in direct-to-consumer genetic tests awareness in HINTS 2007: sociodemographic and numeracy correlates. *J Genet Couns.* 2012; 21: 440–447. doi: [10.1007/s10897-011-9478-2](https://doi.org/10.1007/s10897-011-9478-2) PMID: [22271378](https://pubmed.ncbi.nlm.nih.gov/22271378/)
63. Möttus R, Johnson W, Murray C, Wolf MS, Starr JM, Deary IJ. Towards understanding the links between health literacy and physical health. *Health Psychol.* 2014; 33: 164–173. doi: [10.1037/a0031439](https://doi.org/10.1037/a0031439) PMID: [23437854](https://pubmed.ncbi.nlm.nih.gov/23437854/)
64. Smith PC, Brice JH, Lee J. The relationship between functional health literacy and adherence to emergency department discharge instructions among Spanish-speaking patients. *J Natl Med Assoc.* 2011; 104: 521–527.
65. Kawachi I, Daniels N, Robinson DE. Health disparities by race and class: why both matter. *Health Aff (Millwood).* 2005; 24: 343–352.
66. Chen Y, Feeley TH. Numeracy, information seeking, and self-efficacy in managing health: an analysis using the 2007 Health Information National Trends Survey (HINTS). *Health Commun.* 2014; 29: 843–853. doi: [10.1080/10410236.2013.807904](https://doi.org/10.1080/10410236.2013.807904) PMID: [24266723](https://pubmed.ncbi.nlm.nih.gov/24266723/)
67. Schulz PJ, Nakamoto K. Health literacy and patient empowerment in health communication: the importance of separating conjoined twins. *Patient Educ Couns.* 2013; 90: 4–11. doi: [10.1016/j.pec.2012.09.006](https://doi.org/10.1016/j.pec.2012.09.006) PMID: [23063359](https://pubmed.ncbi.nlm.nih.gov/23063359/)
68. Shieh C, Broome ME, Stump TE. Factors associated with health information-seeking in low-income pregnant women. *Women Health.* 2010; 50: 426–442. doi: [10.1080/03630242.2010.506152](https://doi.org/10.1080/03630242.2010.506152) PMID: [20853218](https://pubmed.ncbi.nlm.nih.gov/20853218/)
69. Brega AG, Ang A, Vega W, Jiang L, Beals J, Mitchell CM Special Diabetes Program for Indians Healthy Heart Demonstration Project. et al. Mechanisms underlying the relationship between health literacy and glycemic control in American Indians and Alaska Natives. *Patient Educ Couns.* 2012; 88: 61–68. doi: [10.1016/j.pec.2012.03.008](https://doi.org/10.1016/j.pec.2012.03.008) PMID: [22497973](https://pubmed.ncbi.nlm.nih.gov/22497973/)
70. Osborn CY, Paasche-Orlow MK, Bailey SC, Wolf MS. The mechanisms linking health literacy to behavior and health status. *Am J Health Behav.* 2011; 35: 118. PMID: [20950164](https://pubmed.ncbi.nlm.nih.gov/20950164/)
71. Wolf MS, Davis TC, Osborn CY, Skripkauskas S, Bennett CL, Makoul G. Literacy, self-efficacy, and HIV medication adherence. *Patient Educ Couns.* 2007; 65: 253–260. PMID: [17118617](https://pubmed.ncbi.nlm.nih.gov/17118617/)
72. Nutbeam D. Defining and measuring health literacy: what can we learn from literacy studies?. *Int J Public Health.* 2009; 54: 303–305. doi: [10.1007/s00038-009-0050-x](https://doi.org/10.1007/s00038-009-0050-x) PMID: [19641847](https://pubmed.ncbi.nlm.nih.gov/19641847/)
